1 **Modeling the demography of species providing extended parental care:**  
2 **A capture-recapture approach with a case study on Polar Bears (*Ursus maritimus*)**

3

4 Sarah Cubaynes<sup>1,2</sup>, Jon Aars<sup>3</sup>, Nigel G. Yoccoz<sup>4</sup>, Roger Pradel<sup>2</sup>, Øystein Wiig<sup>5</sup>, Rolf A Ims<sup>4</sup>  
5 and Olivier Gimenez<sup>2</sup>

6 <sup>1</sup> MMDN, INSERM U1198, EPHE/PSL & University of Montpellier, France

7 <sup>2</sup> CEFÉ, CNRS, Univ Montpellier, Univ Paul Valéry Montpellier 3, EPHE, IRD, Montpellier,  
8 France

9 <sup>3</sup> Norwegian Polar Institute, FRAM Centre, Tromsø, Norway

10 <sup>4</sup> UiT The Arctic University of Norway, Department of Arctic and Marine Biology, Tromsø,  
11 Norway

12 <sup>5</sup> Natural History Museum, University of Oslo, Norway

13

14 **Abstract**

15 1. In species providing extended parental care, one or both parents care for altricial young  
16 over a period including more than one breeding season. We expect large parental investment  
17 and long-term dependency within family units to cause high variability in life trajectories  
18 among individuals with complex consequences at the population level. So far, models for  
19 estimating demographic parameters in free-ranging animal populations do not include  
20 extended parental care, thereby limiting our understanding of its consequences on parents and  
21 offspring life histories.

22 2. We developed a capture-recapture model for studying the demography of species providing  
23 extended parental care. Our model jointly handles statistical dependency among individual  
24 demographic parameters within family units until offspring independence, inter-individual  
25 variability in breeding frequency, variability in the number of offspring born and recruited at

26 each breeding event, the influence of past reproductive history on the caring parent status,  
27 while accounting for imperfect detection of family units. We present the model, assess its  
28 performances using simulated data, and illustrate its use with a long-term dataset collected on  
29 the Svalbard polar bears (*Ursus maritimus*).

30 3. Our model performed well, in terms of bias and mean square error, in estimating  
31 demographic parameters in all simulated scenarios. As expected, bias and rmse were higher in  
32 the scenario with low detectability. For the polar bear case study, we showed that mother age  
33 and outcome of the previous breeding event influenced breeding probability, litter size and  
34 offspring survival. Old females had a higher probability of raising at least one offspring to  
35 independence over a 3-year period, suggesting a higher reproductive success of more  
36 experienced females possibly due to an improvement of hunting skills with age.

37 4. Overall, our results show the importance of accounting for i) the statistical dependency  
38 within family units until offspring independence, and ii) past reproductive history of the  
39 caring parent. If ignored, estimates obtained for breeding probability, litter size, and survival  
40 can be biased. This is of interest in terms of conservation because species providing extended  
41 parental care are often long-living mammals vulnerable or threatened with extinction.

42

43 **Key-words:** apex predator, arctic ecosystem, Bayesian modeling, capture-recapture,  
44 dependency among individuals, family structure, multi-state models, parental care, sociality.

45

## 46 INTRODUCTION

47 Altricial mammals having offspring that need to learn complex skills to ensure survival  
48 beyond independence, such as hunting, orientation, or nest building, show extended or  
49 prolonged parental care (Clutton-Brock, 1991). In such species, one or both parents care for  
50 one or several young over a period including more than one breeding season. This can extend

51 until lifelong maternal care in primates (Van Noordwijk, 2012). Parental care includes any  
52 pre-natal and post-natal allocation, such as feeding and protecting the young, which benefits  
53 an individual offspring development and survival chances, thereby enhancing the parent's  
54 reproductive success (Trivers, 1972). For the offspring, the quality and quantity of care  
55 received can have long-lasting effects on future survival (e.g. Pavard & Branger, 2012), social  
56 status (e.g. Shenk & Scelza, 2012) and reproduction (Royle, Smiseth, & Kölliker, 2012). For  
57 the parent, investment in one young is at the cost of the parent's ability to invest in other  
58 offspring (siblings or future offspring) (Trivers, 1972). It can indeed take several years during  
59 which a parent caring for his young will not be available to reproduce, sometimes not until the  
60 offspring have reached independence, e.g. 2.5 years for female polar bears (Ramsay &  
61 Stirling, 1988), 3.5 to 6 years for female African elephants (Lee & Moss, 1986), and 9.3 years  
62 for female Sumatran orangutans (Wich et al., 2004). The fitness cost of losing one offspring,  
63 in terms of lost investment and skipped breeding opportunities, is therefore particularly high if  
64 death occurs near independence. We expect extended parental care, through large parental  
65 investment and long-term dependency within family units, to cause high variability in life  
66 trajectories among individuals and family groups, in interbirth intervals depending on  
67 offspring's fate, and consequently on lifetime reproductive success for the caring parent  
68 (Clutton-Brock, 1991). Because parental care can affect simultaneously several parental and  
69 offspring traits, its consequences at the population level are still poorly understood, especially  
70 in free-ranging animal populations.

71 Capture-recapture (CR) models allow studying species with complex demography in  
72 the wild, e.g. by considering 'breeder' and 'non-breeder' reproductive states to estimate  
73 breeding probabilities and status-specific demographic parameters while accounting for  
74 imperfect detectability (e.g., Lebreton, Nichols, Barker, Pradel, & Spendelov, 2009). One can  
75 distinguish between successful and failed breeding events (e.g., Lagrange et al., 2017) and

76 include varying litter or clutch size (e.g., Doligez et al., 2002) and memory effects (Cole et al.,  
77 2014), to investigate the costs of reproduction on survival and future reproduction for species  
78 providing short-term parental care, i.e. when offspring reach independence before the next  
79 breeding season (e.g., Yoccoz, Erikstad, Bustnes, Hanssen, & Tveraa, 2002). By including  
80 non-observable states (Lebreton et al., 2009), one can differentiate between pre-breeders,  
81 first-time breeders, experienced breeders, and adult non-breeders to estimate the probabilities  
82 of skipping one breeding opportunity (e.g., Cubaynes, Doherty, Schreiber, & Gimenez, 2011).  
83 Currently however, there is no CR approach for modelling the demography of species  
84 providing extended parental care. This is of particular interest in terms of conservation  
85 because species providing extended parental care are often among long-living mammals  
86 vulnerable or threatened with extinction (e.g. polar bears, orangutans, elephants).

87         Here, we develop a CR model for studying the demography of species providing  
88 extended parental care. Our model jointly handles statistical dependency among individual  
89 demographic parameters within family units until offspring independence, inter-individual  
90 variability in breeding frequency, variability in the number of offspring born and recruited at  
91 each breeding event, the influence of past reproductive history on the caring parent current  
92 status, and accounts for imperfect detection possibly depending upon family unit composition.  
93 In what follows, we present the model, assess its performances using simulated data, and  
94 illustrate its use with a long-term dataset collected on the Svalbard polar bears. Female polar  
95 bears rely only on stored fat reserves during pregnancy and the first three months of lactation,  
96 before feeding and protecting litters of one to three young, usually during two and a half more  
97 years (Ramsay & Stirling, 1988). They can lose more than 40% of body mass while fasting  
98 (Atkinson & Ramsay, 1995). In many areas, climate change and related sea ice decline impact  
99 female bear condition and capacity to provide care for their young, with an associated decline  
100 in reproductive output (Derocher, Lunn, & Stirling, 2004; Stirling & Derocher, 2012). More

101 insights into the species demography, such as the consequences of long-duration parental care  
102 on mother and offspring life histories, could help our understanding of polar bear population  
103 responses to environmental perturbations and extinction risks in future decades (Hunter et al.,  
104 2010; Regehr et al., 2016).

105

## 106 **METHODS**

107

### 108 *Capture-recapture model for species providing extended parental care*

109 The model is based on data on individual encounter histories that record the subsequent  
110 observations or non-observations of individuals in the field, with specific information on the  
111 state of each individual at each capture occasion. States can refer to various characteristics,  
112 such as breeding status, epidemiological status, or a site (Lebreton et al., 2009). We used four  
113 sets of parameters: 1) the proportion of individuals in each state at first capture, 2) state-  
114 specific survival probabilities from occasion  $t$  to  $t+1$ ; 3) transition probabilities from one state  
115 at time  $t$  to another state at  $t+1$  conditioned upon being alive at time  $t+1$ ; and 4) state-specific  
116 individual recapture probabilities at occasion  $t$  (Lebreton et al., 2009).

117         The novelty of our model lies in that the encounter histories are defined for each  
118 family unit instead of each individual. Let us consider a study over  $K$  encounter occasions and  
119  $N$  family units. The encounter history for family unit  $i$  is denoted  $h_{ij} = (o_{i1}, \dots, o_{ik})$  where  $o_{ik}$   
120 records whether family unit  $i$ , at occasion  $k$ , is observed in state  $m$  ( $o_{ik} = m$ ) or not ( $o_{ik} = 0$ ).  
121 The states  $m$  correspond to the composition of family units observed in the field. Thus, the  
122 number and type of states will vary depending on the species considered, the duration and  
123 distribution of parental care between parents, and variability in the number of young  
124 produced. For example, let us consider a species in which a single parent care for a maximum  
125 of  $X$  young over  $Y$  years. The states will be defined as  $m = (P_0, \dots, P_{x,y}, \dots, D)$  where  $P_0$

126 stands for a family unit composed of a single parent,  $P_{x,y}$  for a family unit composed of the  
127 caring parent of  $x$  offspring in their  $y^{\text{th}}$  year of life (with  $1 \leq x \leq X$  and  $1 \leq y \leq Y$ ) and  $D$  is  
128 the dead state.

129 Our model can be decomposed in several matrices gathering the probabilities of the  
130 initial states and four conditional sets of events representing the species life cycle: parent(s)  
131 survival ( $\Phi$ , eq. 1), offspring survival and growth ( $S$ , eq. 2), breeding probabilities ( $A$ , eq. 3)  
132 and number of offspring produced per breeding event ( $B$ , eq. 4), and a matrix gathering the  
133 family unit's recapture probabilities ( $P$ , eq. 5). First, we define the vector  $\Pi_{m-1} =$   
134  $(\pi_0, \dots, \pi_{x,y}, \dots, \pi_{X,Y})$  gathering the initial probabilities of each live state. A first matrix,  
135  $[\phi]_{m,m}$  gathers the state-specific survival probability for the caring parent from time  $t$  to  $t + 1$ .  
136 Then, the transition matrix gathering transition probabilities among states between each  
137 occasion  $t$  to  $t+I$  is decomposed into three intermediate steps conditioning upon each other.  
138 The decomposition helps in estimating meaningful biological quantities corresponding to all  
139 possible events occurring between two capture occasions. We write  $\Psi = S_{m,m_1} A_{m_1,m_2} B_{m_2,m}$ .  
140 The first matrix,  $S_{m,m_1}$ , gathers the state-specific transition probabilities from states  $m$  to  
141 intermediary states  $m_1$ , which correspond to the offspring survival probabilities to the next  
142 age, depending on the caring parent survival, the young age, and number of siblings.  
143 Intermediate states of arrival are defined as  
144  $m_1 = (P_{0 \rightarrow 0}, P_{1,1 \rightarrow 1,2}, P_{1,1 \rightarrow 0}, \dots, P_{x,y \rightarrow x,y+1}, P_{x,y \rightarrow x-1,y+1}, \dots, P_{X,Y-1 \rightarrow X,Y})$ , where, during the  
145 interval between occasions  $t$  and  $t+I$ , a non-breeder parent alive always remain non breeder  
146 ( $0 \rightarrow 0$ ), and for a family unit composed of a caring parent with at least one young, each of  
147 the young can survive and grow to the next age ( $x, y \rightarrow x, y + 1$ ), or die ( $x, y \rightarrow x - 1, y +$   
148  $1$ ). The second matrix,  $A_{m_1,m_2}$ , gathers the state-specific transition probabilities from  
149 intermediate states  $m_1$  to intermediate states  $m_2$ , which correspond to the state-specific  
150 breeding probabilities. Intermediate states of arrival are defined as

151  $m_2 = (P'_{0 \rightarrow 0 \rightarrow 0}, P'_{0 \rightarrow 0 \rightarrow r}, \dots, P'_{x,y \rightarrow x,y+1 \rightarrow 0}, P'_{x,y \rightarrow x,y+1 \rightarrow r}, \dots, P'_{x,y-1 \rightarrow x,y \rightarrow r})$ , where during  
152 the interval between time  $t$  and  $t+I$ , a parent non-breeder at the beginning of the interval and  
153 still alive can breed ( $0 \rightarrow 0 \rightarrow r$ ) or remain non-breeder ( $0 \rightarrow 0 \rightarrow 0$ ), and a parent caring for  
154 at least one young still alive can breed again ( $x, y \rightarrow x, y + 1 \rightarrow r$ ) or not ( $x, y \rightarrow x, y + 1 \rightarrow$   
155  $0$ ), and a parent that just lost one (or several) young of a certain age can breed ( $x, y \rightarrow x -$   
156  $1, y + 1 \rightarrow r$ ) or not ( $x, y \rightarrow x, y + 1 \rightarrow 0$ ). The third matrix,  $B_{m_2, m}$ , gathers the state-specific  
157 transition probabilities from intermediate states  $m_2$  to departures states  $m$ , which correspond  
158 to the probability of producing a certain number of young depending on the previous steps.  
159 The probability will be set to 0 for non-breeders, and can differ for a breeder that was non  
160 breeder at the beginning of the interval ( $0 \rightarrow 0 \rightarrow r \rightarrow x', y' = 1$ ), a parent that breeds while  
161 caring for other young ( $x, y \rightarrow x, y + 1 \rightarrow r \rightarrow x', y' = 1$ ), or a parent that breeds again while  
162 it has just lost its young of a certain age ( $x, y \rightarrow 0 \rightarrow r \rightarrow x', y' = 1$ ). A fifth matrix, the so-  
163 called event matrix,  $[P]_{m,2}$ , gathers the detection probability of family units, where the state-  
164 specific probability of being observed ( $p(p_{x,y})$ ) or not ( $1 - p(p_{x,y})$ ) at occasion  $t$  can vary  
165 depending on the composition of the family unit.

166 The structure of the model implies that the number of offspring produced per breeding  
167 event is conditioned upon breeding decision. Breeding decision is conditioned upon the status  
168 and number of dependent offspring already cared for by the parent, which itself is conditioned  
169 upon parental survival. This particular formulation permits to investigate, among others, the  
170 cost of reproduction on female survival (step 1), the influence of litter size on litter survival  
171 (step 2), the influence of past reproductive history on both breeding probability (step 3), and  
172 on litter size (step 4). The influence of individual traits such as age or body weight, or  
173 environmental variables such as temperature, can be included in the model under the form of  
174 individual or temporal covariates (Pollock, 2002). In addition, specificities related to data  
175 collection can also be included in a similar way, such as trap effects (Pradel & Sanz-Aguilar,

176 2012) or latent individual heterogeneity by using mixture of distributions or random effects  
177 (Gimenez, Cam, & Gaillard, 2018).

178

### 179 *Simulation study*

180 We evaluated the performance of our model using simulated data for a virtual long-lived  
181 mammal species, mimicking the polar bear case study (see next section for details). We  
182 considered that care of offspring was provided by the mother only, to one, two or three  
183 offspring, for 3 years maximum. Parameters included mother survival, young survival,  
184 breeding probabilities and litter size probabilities, as well as detection probability.  
185 Specifically, we used  $\phi_{mother} = 0.9$  for annual adult survival assumed independent of family  
186 unit composition,  $\phi_{cub} = 0.3$  for annual cub survival and  $\phi_{yearling} = 0.5$  for annual yearling  
187 survival, independently of litter size and conditioned upon mother survival. Breeding  
188 probability was  $\alpha_{alone} = 0.6$  for a female alive without dependent offspring,  $\alpha_{cub}^{\dagger} = 0.1$  for  
189 a female alive that just lost her cub litter,  $\alpha_{yearling}^{\dagger} = 0.3$  for a female alive that just lost her  
190 yearling litter, and  $\alpha_{offspring} = 0$  for a female alive with dependent offspring alive. Litter  
191 size probability of one cub for breeding females was i)  $\Pr(LS = 1) = \beta_{alone} = 0.4$  and of  
192 multiple cubs (2 or 3) was  $\Pr(LS > 1) = 0.6$ , for a female previously without offspring, and ii)  
193  $\Pr(LS = 1) = \beta_{offspring}^{\dagger} = 0.5$  and of multiple cubs  $\Pr(LS > 1) = 0.5$  for a female that lost  
194 offspring during the year.

195 We considered three scenarios with low ( $p = 0.3$ ), medium ( $p = 0.5$ ), and high ( $p =$   
196  $0.8$ ), detection of family units. We simulated 100 CR datasets for each detectability scenario  
197 with 25 sampling occasions and 50 newly family units released at each occasion. We  
198 simulated the data using program R. We fitted the model using maximum likelihood in  
199 package TMB called from R (Kristensen, Nielsen, Berg, Skaug, & Bell, 2015). For each



200 parameter, we calculated the bias and root-mean-square error. The code used for carrying out  
201 the simulations is provided in Appendix 1.

202

### 203 *Case study: Polar bears in Svalbard*

204 In Polar bears, care of offspring is provided by the mother only (Amstrup, 2003). Males were  
205 therefore discarded from our analysis. Adult female polar bears mate in spring (February to  
206 May, Amstrup, 2003), and in Svalbard usually have their first litter at the age of six years  
207 (Derocher, 2013). They have delayed implantation where the egg attaches to the uterus in  
208 autumn (Ramsay & Stirling, 1988). A litter with small cubs (ca 600 grams) is born around  
209 November to January, in a snow den that the mothers dig out in autumn, and where the family  
210 stay 4-5 months. The family usually emerges from the den in March-April, and stay close to  
211 the den while the cubs get accustomed to the new environment outside their home, for a few  
212 days up to 2-3 weeks (Hansson & Thomassen, 1983). Litter size in early spring vary from one  
213 to three, with two cubs being most common, three cubs in most areas being rare, and  
214 commonly around one out of three litters having one cub only (Amstrup, 2003). The weaning  
215 age of cubs varies between populations, and is approximatively 2.3 years in the Barents Sea.  
216 The cubs typically depart from the mother in their third spring (March-April), when the  
217 mother can mate again. Thus, the minimum reproductive interval for successful Barents Sea  
218 polar bears is 3 years. On the contrary, loss of a cub litter shortly after den emergence may  
219 mean the mother can produce new cubs in winter the same year (North, 1953).

220 We analyzed  $n = 496$  encounter histories of polar bear family units monitored over 25  
221 years, each spring, from 1992 to 2016, in Svalbard. Polar bears were caught and individually  
222 marked as part of a long-term monitoring program on the ecology of polar bears in the  
223 Barents Sea region. The captures occur each year shortly after den emergence (mid-March to  
224 late April; Andersen Derocher, Wiig, & Aars, 2012). All bears one year or older were

225 immobilized by remote injection of a dart (Palmer Cap-Chur Equipment, Douglasville, GA,  
226 USA) with the drug Zoletil® (Virbac, Carros, France) ( Stirling, Spencer, & Andriashek,  
227 1989). The dart was fired from a small helicopter (Eurocopter 350 B2 or B3), usually from a  
228 distance of about 4 to 10 meters. Cubs of the year were immobilized by injection with a  
229 syringe. Cubs and yearlings are captured together with their mother. Because they are highly  
230 dependent on her, they remain in her vicinity. A female captured alone has no dependent  
231 offspring alive, but could have lost her cubs in the den or shortly after den emergence but  
232 before capture. Hereafter, estimated cub survival thus refers to survival after capture. Infant  
233 mortality occurring before capture will be assigned to a reduced litter size. Because only 3%  
234 of females were observed with 3 offspring, we analyzed jointly litters of twins with triplets.

235 Prior fitting models, we performed goodness-of-fit tests (Pradel, Wintrebert, & Gimenez,  
236 2003) using the R package R2ucare (Gimenez, Lebreton, Choquet, & Pradel, 2018). The  
237 overall test was not significant ( $df = 137$ ,  $\chi^2=67.402$ ,  $p\text{-value} = 1$ ), suggesting no major lack  
238 of fit of the standard time-dependent multistate CR model to our data. Because bears captured  
239 in Svalbard are shown to be a mixture of resident and pelagic bears (Mauritzen, Derocher, &  
240 Wiig, 2011), we included hidden heterogeneity in the detection process. To do so, we  
241 considered a mixture of two classes of individuals on recapture probability (Gimenez, Cam,  
242 & Gaillard, 2018) to account for the lower probability for pelagic bears of being detected  
243 every year. Last, previous studies have found senescence starts around age 15 in polar bears,  
244 we therefore distinguished survival and reproductive parameters of ‘prime-age’  $<15$  y.o. and  
245 ‘old’  $\geq 15$  y.o. (Derocher & Stirling, 1994).

246 We built the model with 8 states corresponding to the field observations of different  
247 family units composition:  $m = (F_o, F_c, F_{c+}, F_y, F_{y+}, F_t, F_{t+}, D)$  respectively standing for  
248 female alone, female with one cub, female with multiple cubs, female with 1 yearling, female  
249 with multiple yearlings, female with one two-year old, female with multiple two-year olds,

250 and dead female. The vector of initial states,  $\Pi_0 = (\pi_1, \pi_2, \pi_3, \pi_4, \pi_5, \pi_6, \pi_7, 0)$  gathers the  
 251 proportion of family units in each live state at first capture. The first step determines mother  
 252 survival depending on offspring number and age, with matrix  $[\phi]_{m,m}$  defined as:

$$253 \quad [\phi]_{m,m} = \begin{bmatrix} F_{0,j} & 0 & 0 & 0 & 0 & 0 & 0 & 1 - F_{0,j} \\ 0 & F_{c,j} & 0 & 0 & 0 & 0 & 0 & 1 - F_{c,j} \\ 0 & 0 & F_{c+,j} & 0 & 0 & 0 & 0 & 1 - F_{c+,j} \\ 0 & 0 & 0 & F_{y,j} & 0 & 0 & 0 & 1 - F_{y,j} \\ 0 & 0 & 0 & 0 & F_{y+,j} & 0 & 0 & 1 - F_{y+,j} \\ 0 & 0 & 0 & 0 & 0 & F_{t,j} & 0 & 1 - F_{t,j} \\ 0 & 0 & 0 & 0 & 0 & 0 & F_{t+,j} & 1 - F_{t+,j} \\ 0 & 0 & 0 & 0 & 0 & 0 & 0 & 1 \end{bmatrix}, \quad (\text{eq. 1})$$

254 where  $_{i,j}$  is the annual survival probability of a mother of age  $j$  in state  $i$  at capture occasion  $t$ .  
 255 Preliminary analyses showed that mother survival did not vary according to composition of  
 256 the family unit. We therefore did not include variation among states and included only the  
 257 effect of age on mother survival, hereafter  $_{i,j}$  with  $j = 1$  for prime-age and  $j = 2$  for old  
 258 females.

259 The second step determines young survival and growth conditioned upon mother survival  
 260 during time interval  $t$  to  $t + 1$ . Intermediary states are defined such as  $m_l = (F_o, F_c, F_{y-}, F_y,$   
 261  $F_{y+}, F_t, F_{t+}, D)$  respectively standing for surviving female alone, surviving female losing all  
 262 cubs, surviving female losing all yearlings, surviving female with one surviving cub growing  
 263 into a yearling, surviving female with multiple surviving cubs growing into multiple  
 264 yearlings, surviving female with one surviving yearling growing into one two-year old,  
 265 surviving female with multiple surviving yearlings growing into multiple two-year olds, and  
 266 dead females. The second matrix,  $[S]_{m,m_1}$  gathering young survival probabilities depending  
 267 on age and on sibling's number is defined as:

$$268 \quad [S]_{m,m_1} = \begin{bmatrix} 1 & 0 & 0 & 0 & 0 & 0 & 0 & 0 \\ 0 & 1 - \phi_{2,j} & 0 & \phi_{2,j} & 0 & 0 & 0 & 0 \\ 0 & 1 - S_{11,j} - S_{2,j} & 0 & S_{1,j} & S_{2,j} & 0 & 0 & 0 \\ 0 & 0 & 1 - \phi_{3,j} & 0 & 0 & \phi_{3,j} & 0 & 0 \\ 0 & 0 & 1 - S_{3,j} - S_{4,j} & 0 & 0 & S_{3,j} & S_{4,j} & 0 \\ 1 & 0 & 0 & 0 & 0 & 0 & 0 & 0 \\ 1 & 0 & 0 & 0 & 0 & 0 & 0 & 0 \\ 0 & 0 & 0 & 0 & 0 & 0 & 0 & 1 \end{bmatrix}, \quad (\text{eq. 2})$$

269

270 where, for litters of singletons,  $\phi_{2,j}$  is cub survival, and  $\phi_{3,j}$  is yearling survival for a  
 271 surviving mother of age  $j$  during time interval  $t$  to  $t+1$ . For litters of multiple offspring,  $S_{ij}$  is  
 272 the probability that only one cub,  $S_{1,j}$ , resp. one yearling,  $S_{3,j}$ , or all cubs,  $S_{2,j}$ , resp. all  
 273 yearling,  $S_{4,j}$ , survive conditioned upon mother survival for a mother of age  $j$ .

274 The third step determines breeding probability conditioned upon mother survival, age  
 275 and young survival and growth during time interval  $t$  to  $t + 1$ . Intermediary states are defined  
 276 such as  $m_2 = (F_0, F_{0 \rightarrow r}, F_{f \rightarrow r}, F_y, F_{y+}, F_t, F_{t+}, D)$  respectively standing for surviving  
 277 female alone remaining non-breeder, surviving female alone becoming breeder, surviving  
 278 female that lost her offspring becoming breeder, surviving female with one surviving cub  
 279 growing into a yearling remaining non-breeder, surviving female with multiple surviving cubs  
 280 growing into several yearlings remaining non-breeder, surviving female with one surviving  
 281 yearling growing into one two-year old remaining non-breeder, surviving female with  
 282 multiple surviving yearlings growing into several two-year old remaining non-breeder, and  
 283 dead females. The third matrix,  $[A]_{m_1, m_2}$  gathering breeding probabilities depending on the  
 284 previous steps is defined as:

$$285 \quad [A]_{m_1, m_2} = \begin{bmatrix} 1 - \alpha_{1,j} & \alpha_{1,j} & 0 & 0 & 0 & 0 & 0 & 0 & 0 \\ 1 - \alpha_{2,j} & 0 & \alpha_{2,j} & 0 & 0 & 0 & 0 & 0 & 0 \\ 1 - \alpha_{3,j} & 0 & \alpha_{3,j} & 0 & 0 & 0 & 0 & 0 & 0 \\ 0 & 0 & 0 & 1 & 0 & 0 & 0 & 0 & 0 \\ 0 & 0 & 0 & 0 & 1 & 0 & 0 & 0 & 0 \\ 0 & 0 & 0 & 0 & 0 & 1 & 0 & 0 & 0 \\ 0 & 0 & 0 & 0 & 0 & 0 & 1 & 0 & 0 \\ 0 & 0 & 0 & 0 & 0 & 0 & 0 & 1 & 0 \\ 0 & 0 & 0 & 0 & 0 & 0 & 0 & 0 & 1 \end{bmatrix}, \quad (\text{eq. 3})$$

286

287 where  $\alpha_{i,j}$  is the breeding probability of a surviving female of age  $j$  alone ( $\alpha_1$ ), that lost cubs  
 288 ( $\alpha_2$ ), and that lost yearlings ( $\alpha_3$ ).

289 The fourth step determines litter size probabilities for reproductions occurring during  
 290 the time interval  $t$  to  $t+1$  depending on the previous steps, with matrix  $[B]_{m_2,m}$  being defined  
 291 as:

$$292 \quad [B]_{m_2,m} = \begin{bmatrix} 1 & 0 & 0 & 0 & 0 & 0 & 0 & 0 \\ 0 & \beta_{1,j} & 1 - \beta_{1,j} & 0 & 0 & 0 & 0 & 0 \\ 0 & \beta_{2,j} & 1 - \beta_{2,j} & 0 & 0 & 0 & 0 & 0 \\ 0 & 0 & 0 & 1 & 0 & 0 & 0 & 0 \\ 0 & 0 & 0 & 0 & 1 & 0 & 0 & 0 \\ 0 & 0 & 0 & 0 & 0 & 1 & 0 & 0 \\ 0 & 0 & 0 & 0 & 0 & 0 & 1 & 0 \\ 0 & 0 & 0 & 0 & 0 & 0 & 0 & 1 \end{bmatrix}, \quad (\text{eq. 4})$$

293  
 294 where  $\beta_{i,j}$  (resp.  $1 - \beta_{i,j}$ ) is the probability of producing a single cub per litter (resp. a litter of  
 295 twins) for females of age  $j$  that were alone,  $\beta_{1,j}$ , or have lost offspring,  $\beta_{2,j}$ , during the time  
 296 interval  $t$  to  $t + 1$ .

297 The fifth step relates the states to field observations  $e = (F_o, F_c, F_{c+}, F_y, F_{y+}, F_t, F_{t+},$   
 298  $0)$ , ‘0’ meaning non-detected. The observation matrix that gathers the family unit’s  
 299 probability of detection at occasion  $t$  is defined as:

$$300 \quad [P]_{m,e} = \begin{bmatrix} p_i & 0 & 0 & 0 & 0 & 0 & 0 & 1 - p_i \\ 0 & p_i & 0 & 0 & 0 & 0 & 0 & 1 - p_i \\ 0 & 0 & p_i & 0 & 0 & 0 & 0 & 1 - p_i \\ 0 & 0 & 0 & p_i & 0 & 0 & 0 & 1 - p_i \\ 0 & 0 & 0 & 0 & p_i & 0 & 0 & 1 - p_i \\ 0 & 0 & 0 & 0 & 0 & p_i & 0 & 1 - p_i \\ 0 & 0 & 0 & 0 & 0 & 0 & p_i & 1 - p_i \\ 0 & 0 & 0 & 0 & 0 & 0 & 0 & 1 \end{bmatrix}, \quad (\text{eq. 5})$$

301  
 302 where,  $p_i$ , respectively  $1 - p_i$ , is the probability of being detected, respectively not detected, for  
 303 family unit composition belonging to sub-population  $i$ . Each family unit has a probability  
 304  $\rho_{resident}$  (resp.  $1 - \rho_{resident} = \rho_{pelagic}$ ) of belonging to one or the other mixture component.  
 305 We provide the code with guidance to fit the model in a Bayesian framework in program Jags  
 306 called from R in Appendix 2.

307 Using the conditional probabilities estimated in the model, we calculated the net  
 308 probability for a female of age  $j$  to raise none,  $\Pr(X=0)$ , one,  $\Pr(X=1)$ , or two young,  $\Pr(X=2)$   
 309 close to independence (age 2) over a 3-year period (Figure 1).

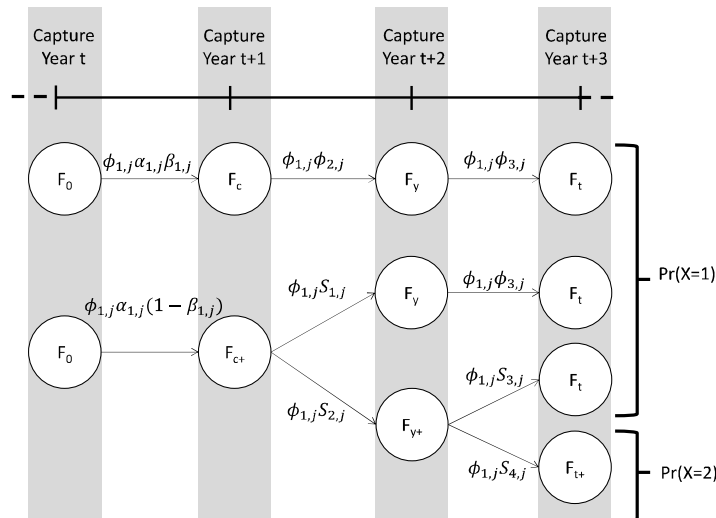

310

311 Figure 1: Life history events with associated probabilities of raising at least one young near  
 312 independence (to age 2) over a 3 years period. For a female polar bear of age  $j$ ,  $j = 1$  for  
 313 ‘prime-age’ and  $j = 2$  for ‘old’, alive and without dependent young at the beginning of the  
 314 period,  $\phi_{1,j}$  is adult survival,  $\alpha_{1,j}$  is breeding probability,  $\beta_{1,j}$  is litter size probability of one,  
 315  $\Pr(LS=1)$ ,  $\phi_{2,j}$  and  $\phi_{3,j}$  resp. cub and yearling survival in a singleton litter. In a litter of  
 316 multiple young  $S_{1,j}$ , resp.  $S_{2,j}$ , is the probability that only one cub survives, resp. all cubs in  
 317 the litter survive and  $S_{3,j}$ , resp.  $S_{4,j}$ , is the probability that only one yearling survives, resp. all  
 318 yearlings in the litter survive.

319

320 We considered mature females that were without dependent offspring at the beginning of the  
 321 time period, so that we have for females of age  $j$ :

$$322 \Pr(X = 1 | j) = (\phi_{1,j})^3 \cdot \alpha_{1,j} \cdot [\beta_{1,j} \cdot \phi_{2,j} \cdot \phi_{3,j} + (1 - \beta_{1,j}) \cdot (S_{1,j} \cdot \phi_{3,j} + S_{2,j} \cdot S_{3,j})],$$

$$323 \Pr(X = 2 | j) = (\phi_{1,j})^3 \cdot \alpha_{1,j} \cdot (1 - \beta_{1,j}) \cdot S_{2,j} \cdot S_{4,j} \quad ,$$

$$324 \Pr(X = 0 | j) = 1 - \Pr(X = 1) - \Pr(X = 2) .$$

325

326 **RESULTS**

327 *Model performance evaluated on simulated datasets*

328 Model performance was satisfying in all simulated scenarios, with average bias  $B = 0.0014$   
 329 and root-mean-square error  $rmse = 0.027$ . As expected, bias and rmse were higher in the  
 330 scenario with low detectability (Figure 2; results for medium and high detectability are  
 331 provided in Appendix 3). For most parameters, bias was very low,  $B < 0.01$ , except for  $S_4$ , the  
 332 probability that both twins in a litter survive from their second year of life,  $B = 0.025$ .  
 333

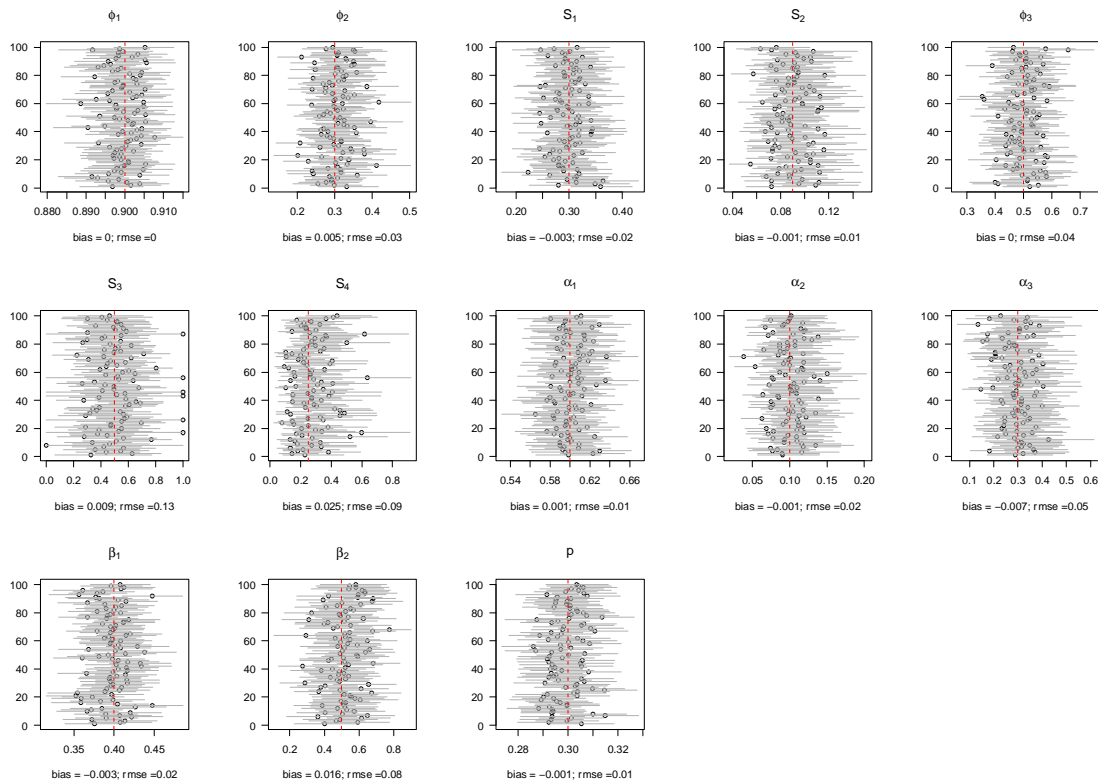

334  
 335 Figure 2. Performance of the model on simulated data with low detectability. For each of the  
 336 100 simulated data sets, we displayed the mean (circle) and the 95% confidence interval  
 337 (horizontal solid line) of the parameter. The actual value of the parameter is given by the  
 338 vertical dashed red line. The estimated absolute bias and root-mean-square error are provided  
 339 in the legend of the X-axis for each parameter. Regarding notations,  $\phi_1$  is adult survival,  $\phi_2$   
 340 and  $\phi_3$  resp. cub and yearling survival in a singleton litter. In a litter of multiple young  $S_1$  ,  
 341 resp.  $S_2$ , is the probability that only one cub survives, resp. all cubs in the litter survive and

342  $S_3$ , resp.  $S_4$ , is the probability that only one yearling survives, resp. all yearlings in the litter  
343 survive. Then,  $\alpha_1$ , resp.  $\alpha_2$ , resp.  $\alpha_3$ , is the breeding probability of a female previously alone,  
344 resp. that have lost a cub litter, resp. that lost a yearling litter during the year, and  $\beta_1$ , resp.  $\beta_2$ ,  
345 is litter size probability of one,  $\Pr(LS=1)$ , for females previously non breeder, resp. failed  
346 breeder that lost a litter during the year,  $p$  is the family unit's detection probability.

347

#### 348 *Case study: Polar bear demography*

349 Posterior distributions are given for all estimated parameters (Appendix 2). Annual female  
350 survival was high and lower for old females (Table 1 and Figure 3). Cubs and yearling  
351 survival rates, conditioned upon mother survival, were lower for singleton than for litters of  
352 twin for young mothers but were higher and did not depend on litter size for old mothers  
353 (Table 1 and Figure 3). Outcome of the previous reproduction influenced breeding probability  
354 for young and old females (Figure 3). Breeding probability was <15% for females that lost a  
355 cub litter during the year, about 20-30% for females that lost a yearling litter and increased to  
356 50-65% for females that were alone at the beginning of the year (Table 1). Old females had a  
357 higher probability than young females of breeding when alone, but about the same if they had  
358 lost a litter at the beginning of the year. For breeding females that had lost a litter at the  
359 beginning of the year, the probability of producing a single cub was higher for older than  
360 younger females, while there was no difference in litter size probability between young and  
361 old females that did not fail at previous reproduction (Table 1 and Figure 3).

362 At first capture, 52% of adult females were alone, 11% with one cub, 22% with two  
363 cubs, 8% with one yearling, 3% with multiple yearlings and 2% with one or multiple two-year  
364 old bears. About 15% (0.10 – 0.23) of family units belonged to the high detectability group,  
365 with an annual detection rate of 0.42 (0.33 – 0.51), while 85% (0.77 – 0.90) of family units  
366 had a low annual detection probability of 0.04 (0.02 – 0.06).

367

368



369 Table 1: Parameter estimates. Means are given with 95% credible intervals (CI). Offspring  
 370 survival and breeding probabilities are conditioned upon mother survival, litter size  
 371 probability of one Pr(LS=1) is as well conditioned upon breeding probability.

| Parameter                         | Female <15 y.o.       | Mean with 95% CI   | Female 15+ y.o.       | Mean with 95% CI   |
|-----------------------------------|-----------------------|--------------------|-----------------------|--------------------|
| <b>Mother survival</b>            | $\phi_{11}$           | 0.90 (0.85 – 0.95) | $\phi_{12}$           | 0.86 (0.82 – 0.90) |
| <b>Offspring survival</b>         |                       |                    |                       |                    |
| cub (single litter)               | $\phi_{21}$           | 0.36 (0.15 – 0.59) | $\phi_{22}$           | 0.51 (0.31 – 0.71) |
| yearling (single litter)          | $\phi_{31}$           | 0.44 (0.22 – 0.68) | $\phi_{32}$           | 0.60 (0.40 – 0.81) |
| only one cub (litter of 2)        | $S_{11}$              | 0.36 (0.18 – 0.55) | $S_{12}$              | 0.19 (0.06 – 0.38) |
| both cubs (litter of 2)           | $S_{21}$              | 0.22 (0.11 – 0.37) | $S_{22}$              | 0.43 (0.24 – 0.65) |
| all cubs die (litter of 2)        | $1 - S_{11} - S_{21}$ | 0.42 (0.25 – 0.60) | $1 - S_{12} - S_{22}$ | 0.38 (0.19 – 0.58) |
| only one yearling (litter of n>1) | $S_{31}$              | 0.34 (0.08 – 0.70) | $S_{32}$              | 0.22 (0.05 – 0.49) |
| both yearling (litter of n>1)     | $S_{41}$              | 0.39 (0.11 – 0.74) | $S_{42}$              | 0.23 (0.06 – 0.49) |
| all yearling die (litter of n>1)  | $1 - S_{31} - S_{41}$ | 0.27 (0.08 – 0.54) | $1 - S_{32} - S_{42}$ | 0.55 (0.29 – 0.78) |
| <b>Breeding probability</b>       |                       |                    |                       |                    |
| female alone                      | $\alpha_{11}$         | 0.51 (0.38 – 0.64) | $\alpha_{12}$         | 0.64 (0.50 – 0.78) |
| failed breeder (lost cubs)        | $\alpha_{21}$         | 0.15 (0.02 – 0.38) | $\alpha_{22}$         | 0.09 (0 – 0.13)    |
| failed breeder (lost yearling)    | $\alpha_{31}$         | 0.31 (0.06 – 0.41) | $\alpha_{32}$         | 0.19 (0.03 – 0.25) |
| <b>Litter size probability</b>    |                       |                    |                       |                    |
| previously alone                  | $\beta_{11}$          | 0.39 (0.22 – 0.57) | $\beta_{12}$          | 0.46 (0.31 – 0.61) |
| failed breeder                    | $\beta_{21}$          | 0.23 (0.01 – 0.65) | $\beta_{22}$          | 0.67 (0.23 – 0.99) |

372

373

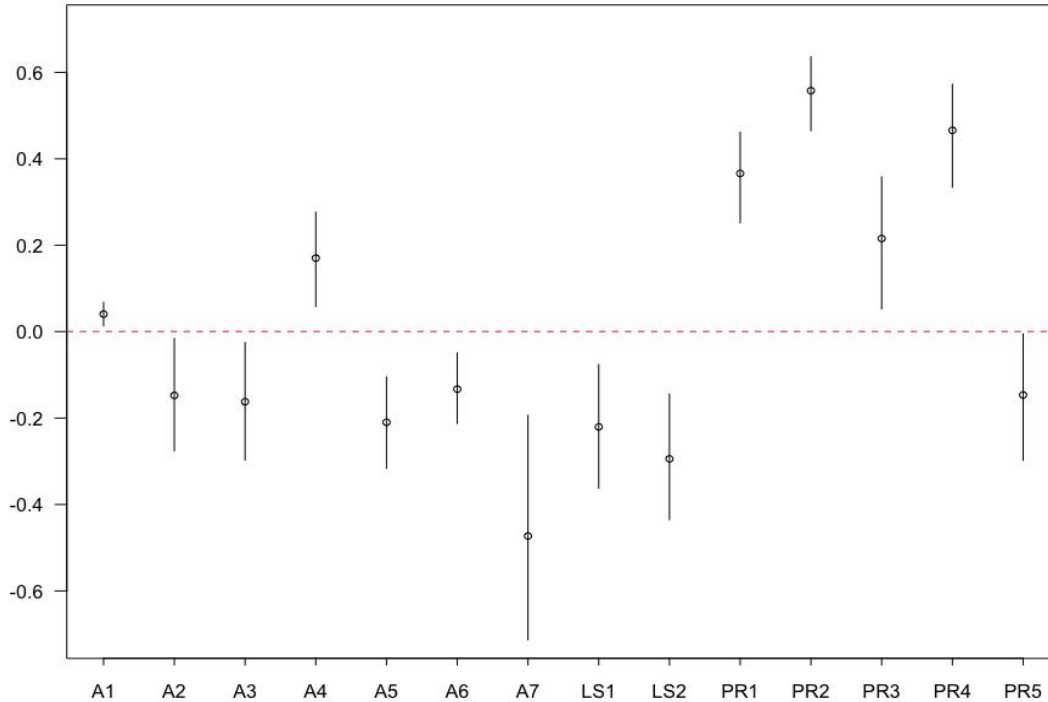

374  
375 Figure 3. Effects of maternal age (A), litter size (LS) and outcome of the previous  
376 reproduction (PR) on adult and young survival, breeding probability and litter size. Median  
377 (dot) with 80% credible interval (segment) are displayed for significant effects only. Mother  
378 age effects (young female minus old female coefficient) on adult survival (A1), single litter  
379 cub survival (A2), single litter yearling survival (A3), on the probability that one (A4) or all  
380 (A5) cubs survive in a multiple litter, on breeding probability for females alone (A6), and on  
381 the probability of litter size of 1 for failed breeders (A7). Effects of litter size (single litter  
382 minus multiple litter coefficient) on cub litter survival for young mothers (LS1) and on  
383 yearling litter survival for young mothers (LS2). Effects of previous reproduction on breeding  
384 probability for young mothers (PR1, PR3 and PR5) and for old mothers (PR2 and PR4); the  
385 coefficient is either the difference between breeding probability of a female alone vs one that  
386 lost a cub litter (PR1 and PR2) or that lost a yearling litter (PR3 and PR4) or that lost a cub  
387 litter vs a yearling litter (PR5).

388

389 Results obtained for the net probability of successfully raising 0, 1 or 2 young to their  
390 second birthday for females over a 3-year period showed that old females had a higher  
391 probability of raising at least one offspring. For all females, the probability of raising two  
392 young to their second birthday, was very low (Table 2). Note that this calculation includes  
393 breeding probability, and therefore does not reflect offspring survival until weaning (see  
394 Method section).

395

396 Table 2: Probability of raising none,  $\Pr(X=0)$ , one,  $\Pr(X=1)$ , or two young,  $\Pr(X=2)$  close to  
397 independence (age 2) over a 3-year period for females younger than 15 y.o. and at least 15 y.o.  
398 that were alive and without dependent young at the beginning of the period. Medians with  
399 95% credible intervals are provided.

|                       | $\Pr(X=0)$         | $\Pr(X=1)$         | $\Pr(X=2)$        |
|-----------------------|--------------------|--------------------|-------------------|
| female < 15y.o.       | 0.91 (0.85 – 0.95) | 0.07 (0.04 – 0.13) | 0.02 (0 – 0.04)   |
| female $\geq$ 15 y.o. | 0.88 (0.82 – 0.92) | 0.10 (0.06 – 0.16) | 0.02 (0.01 -0.05) |

400

401

## 402 **DISCUSSION**

403 Overall, our model performed well on both simulated and real data. Estimates obtained for  
404 mother and young survival rates within family units, probability of breeding and of litter  
405 sizes, and detection probability were unbiased in most simulated scenarios. Bias and root-  
406 mean square errors were the highest for twin yearling litter survival when family units'  
407 detection rate was low. We believe bias on these specific parameters is due to parameters of  
408 the transition matrices being conditioned upon each other. Because of this, having enough  
409 yearling and two-year old litter of twin in the data to estimate twin yearling litter survival  
410 requires high enough adult and cub survival, breeding probability and litter size probability of

411 two, as well as detection probability and number of individuals. Prior to fitting our model, one  
412 should ensure via simulations (see Appendix 1) that sample size and detection probability is  
413 high enough for its applicability. Inference in a Bayesian framework is useful in this regard,  
414 because it allows to include prior information when available (McCarthy & Masters, 2005) to  
415 help estimation of the model parameters. In the polar bear data, there were few recaptures of  
416 females on subsequent years due to relatively low detection rate. As a result, preliminary  
417 analyses suggested a potential confusion between these parameters. We dealt with this issue  
418 by including a biologically realistic constraint on prior distributions, stating that cub survival  
419 was lower than that of yearling (Amstrup & Durner, 1995) which was enough to ensure  
420 parameter estimability.

421 For polar bears, we showed that mother age and outcome of the previous breeding  
422 event influenced breeding probability, litter size and offspring survival. Reduced offspring  
423 survival one year, for example due to poor environmental conditions (Derocher, Lunn, &  
424 Stirling, 2004), might therefore increase intervals between successful reproduction through  
425 reduced breeding probability and litter size the next year. This means that by ignoring long-  
426 term dependency among mother and offspring life histories, classical models can  
427 underestimate reproductive intervals, therefore risking to overestimate the population growth  
428 rate. Adult survival and offspring survival to weaning were lower than previously estimated in  
429 Svalbard (Wiig 1998). Our model likely underestimated yearling survival because two-year-  
430 old bears frequently have already departed from their mother in Spring during the recaptures.  
431 This could explain the low probability of successfully raising at least one offspring to two-  
432 year-old over a 3-year period (Table 2). We also found that old females had a higher  
433 probability of raising at least one offspring close to independence over a 3-year period. It  
434 suggested a higher reproductive success of more experienced females possibly due to an  
435 improvement of hunting skills with age (Folio et al., in press; Atkinson & Ramsay, 1995).

436 However, the biological relevance of our model is currently limited, because we ignored  
437 temporal and individual heterogeneity among females in the model. Future analyses will  
438 integrate in the model density-dependent processes and influence of climatic variables on  
439 body weight and demography (Derocher et al., 2004; Stirling & Derocher, 2012) as individual  
440 and environmental covariates in a regression-like framework. Date of capture will also be  
441 included as a covariate on detection to model the probability of two-year olds still being with  
442 the mother in spring.

443 Here, we proposed a general model structure that can be applied to other species  
444 providing extended parental care, e.g. primates or elephants. The originality of our approach  
445 lies in using family structure to define statistical units in our model. It allows to include  
446 dependency among individuals and therefore evaluate correlations between offspring and  
447 parents' life history parameters. By modifying the matrices to include a higher number of  
448 family unit structures (eq. 1 to eq. 5), one can easily include biparental care, and/or grand-  
449 parental care for species like wolves or humans, variable duration of parental care, number of  
450 young, and breeding and litter size probabilities for breeding parents caring for older offspring  
451 (Clutton-Brock et al. 1991). Such extensions of our model could be used, for example, to  
452 evaluate the population-level consequences of positive or negative correlation between  
453 parents and offspring traits (e.g. food sharing among group members Lee, 2008; or parent-  
454 offspring conflict Kölliker, Kilner, & Hinde, 2013). For polar bears specifically, our model  
455 could be used to extend the population model proposed by Hunter et al. (2010) to include  
456 variability in litter size and breeding frequency depending on the fate of the mothers' past  
457 breeding event. This approach would permit to reassess extinction risks and predictions of the  
458 demographic response of polar bear populations under climate change (Hunter et al., 2010;  
459 Regehr et al., 2016).



461 **Bibliography**

- 462 Amstrup, S. C. (2003). The Polar Bear — *Ursus maritimus*. In *Wild Mammals of North*  
463 *America: Biology, Management, and Conservation*. doi:10.1093/beheco/11.6.633
- 464 Amstrup, S. C., & Durner, G. M. (1995). Survival rates of radio-collared female polar bears  
465 and their dependent young. *Canadian Journal of Zoology*, 73, 1312–1322.  
466 doi:10.1139/z95-155
- 467 Andersen, M., Derocher, A. E., Wiig, Ø., & Aars, J. (2012). Polar bear (*Ursus maritimus*)  
468 maternity den distribution in Svalbard, Norway. *Polar Biology*, 35(4), 499–508.  
469 doi:10.1007/s00300-011-1094-y
- 470 Atkinson, S. N., & Ramsay, M. A. (1995). The Effects of Prolonged Fasting of the Body  
471 Composition and Reproductive Success of Female Polar Bears (*Ursus maritimus*).  
472 *Functional Ecology*, 9(4), 559. doi:10.2307/2390145
- 473 Clutton-Brock, T. (1991). The evolution of parental care. Retrieved from  
474 [https://books.google.fr/books?hl=en&lr=&id=uRS2WusqW8kC&oi=fnd&pg=PR11&ots](https://books.google.fr/books?hl=en&lr=&id=uRS2WusqW8kC&oi=fnd&pg=PR11&ots=n3Sdalrwao&sig=0Qu62YrxsRMPk4EeDJrHZwS-iRA)  
475 [=n3Sdalrwao&sig=0Qu62YrxsRMPk4EeDJrHZwS-iRA](https://books.google.fr/books?hl=en&lr=&id=uRS2WusqW8kC&oi=fnd&pg=PR11&ots=n3Sdalrwao&sig=0Qu62YrxsRMPk4EeDJrHZwS-iRA)
- 476 Cole, D. J., Morgan, B. J. T., McCrea, R. S., Pradel, R., Gimenez, O., & Choquet, R. (2014).  
477 Does your species have memory? Analyzing capture-recapture data with memory  
478 models. *Ecology and Evolution*, n/a-n/a. doi:10.1002/ece3.1037
- 479 Cubaynes, S., Doherty, P. F., Schreiber, E. A., & Gimenez, O. (2011). To breed or not to  
480 breed: A seabird's response to extreme climatic events. *Biology Letters*, 7(2).  
481 doi:10.1098/rsbl.2010.0778
- 482 Derocher, A. (2013). Polar bears: a complete guide to their biology and behavior. *Choice*  
483 *Reviews Online*, 49(12), 49-6887-49-6887. doi:10.5860/choice.49-6887

- 484 Derocher, A. ., Lunn, N. ., & Stirling, I. (2004). Polar bears in a warming climate. (*Ursus*  
485 *maritimus*). *Integrative and Comparative Biology*, *44*(2), 163–176.
- 486 Derocher A., & Stirling, I. (1994). Age-specific reproductive performance of female polar  
487 bears (*Ursus maritimus*). *Journal of Zoology*, *234*(4), 527–536.
- 488 Doligez, B., Clobert, J., Pettifor, R. A., Rowcliffe, M., Gustafsson, L., Perrins, C. M., &  
489 McCleery, R. H. (2002). Costs of reproduction: Assessing responses to brood size  
490 manipulation on life-history and behavioural traits using multi-state capture-recapture  
491 models. *Journal of Applied Statistics*, *29*(1–4), 407–423.
- 492 Folio, D. M., Aars, J., Gimenez, O., Derocher, A. E., Wiig, Ø., & Cubaynes, S. (n.d.). How  
493 many cubs can a mum raise? Maternal age and size influence litter size in polar bears.  
494 *BioRxiv*, 532945.
- 495 Gimenez, O., Cam, E., & Gaillard, J.-M. (2018). Individual heterogeneity and capture-  
496 recapture models: what, why and how? *Oikos*, *127*(5), 664–686.
- 497 Gimenez, O., Lebreton, J.-D., Choquet, R., & Pradel, R. (2018). R2ucare: An r package to  
498 perform goodness-of-fit tests for capture-recapture models. *Methods in Ecology and*  
499 *Evolution*, *9*(7), 1749–1754.
- 500 Hansson, R., & Thomassen, J. (1983). Behavior of polar bears with cubs in the denning area.  
501 *Bears: Their Biology and Management*, 246–254.
- 502 Hunter, C. M., Caswell, H., Runge, M. C., Regehr, E. V., Amstrup, S. C., & Stirling, I.  
503 (2010). Climate change threatens polar bear populations: a stochastic demographic  
504 analysis. *Ecology*, *91*(10), 2883–2897.
- 505 Kölliker, M., Kilner, R. M., & Hinde, C. A. (2013). Parent–offspring conflict. In *The*  
506 *Evolution of Parental Care*.
- 507 Kristensen, K., Nielsen, A., Berg, C. W., Skaug, H., & Bell, B. (2015). TMB: Automatic



- 508           Differentiation and Laplace Approximation. *Journal of Statistical Software*, 70(5), 1–21.
- 509   Lagrange, P., Gimenez, O., Doligez, B., Pradel, R., Garant, D., Pelletier, F., & Bélisle, M.
- 510           (2017). Assessment of individual and conspecific reproductive success as determinants
- 511           of breeding dispersal of female tree swallows: A capture-recapture approach. *Ecology*
- 512           *and Evolution*, 7(18), 7334–7346.
- 513   Lebreton, J. D., Nichols, J. D., Barker, R. J., Pradel, R., & Spendelov, J. A. (2009). Chapter 3
- 514           Modeling Individual Animal Histories with Multistate Capture-Recapture Models.
- 515           *Advances in Ecological Research*.
- 516   Lee, P. C., & Moss, C. J. (1986). Early maternal investment in male and female African
- 517           elephant calves. *Behavioral Ecology and Sociobiology*, 18(5), 353–361.
- 518   Lee, R. (2008). Sociality, selection, and survival: Simulated evolution of mortality with
- 519           intergenerational transfers and food sharing. *Proceedings of the National Academy of*
- 520           *Sciences*.
- 521   Mauritzen, M., Derocher, A. E., & Wiig, Ø. (2011). Space-use strategies of female polar bears
- 522           in a dynamic sea ice habitat. *Canadian Journal of Zoology*, 79(9), 1704–1713.
- 523   McCarthy, M. A., & Masters, P. (2005). Profiting from prior information in Bayesian
- 524           analyses of ecological data. *Journal of Applied Ecology*, 42(6), 1012–1019.
- 525   Pavard, S., & Branger, F. (2012). Effect of maternal and grandmaternal care on population
- 526           dynamics and human life-history evolution: A matrix projection model. *Theoretical*
- 527           *Population Biology*.
- 528   Pollock, K. H. (2002). The use of auxiliary variables in capture-recapture modelling: An
- 529           overview. *Journal of Applied Statistics*, 29(1–4), 85–102.
- 530   Pradel, R., & Sanz-Aguilar, A. (2012). Modeling Trap-Awareness and Related Phenomena in
- 531           Capture-Recapture Studies. *PLoS ONE*, 7(3), e32666.

- 532 Pradel, R., Wintrebert, C. M. A., & Gimenez, O. (2003). A Proposal for a Goodness-of-Fit  
533 Test to the Arnason-Schwarz Multisite Capture-Recapture Model. *Biometrics*, 59(1), 43–  
534 53.
- 535 Ramsay, M. A., & Stirling, I. (1988). Reproductive biology and ecology of female polar bears  
536 in western Hudson Bay. *Naturaliste Canadien*, 109(4), 941–946.
- 537 Regehr, E. V., Laidre, K. L., Resit Akcakaya, H., Amstrup, S. C., Atwood, T. C., Lunn, N. J.,  
538 ... Wiig, Ø. (2016). Conservation status of polar bears (*Ursus maritimus*) in relation to  
539 projected sea-ice declines. *Biology Letters*, 12(12).
- 540 Royle, N., Smiseth, P., & Kölliker, M. (2012). The evolution of parental care.
- 541 Shenk, M. K., & Scelza, B. A. (2012). Paternal investment and status-related child outcomes:  
542 Timing of father's death affects offspring success. *Journal of Biosocial Science*.
- 543 Stirling, I., & Derocher, A. E. (2012). Effects of climate warming on polar bears: a review of  
544 the evidence. *Global Change Biology*, 18(9), 2694–2706.
- 545 Stirling, I., & Derocher, A. E. (2012). Effects of climate warming on polar bears: a review of  
546 the evidence. *Global Change Biology*, 18(9), 2694–2706.
- 547 Stirling, I., Spencer, C., & Andriashek, D. (1989). Immobilization of polar bears (*Ursus*  
548 *maritimus*) with Telazol in the Canadian Arctic. *Journal of Wildlife Diseases*, 25(2),  
549 159–168.
- 550 Trivers, R. L. 1972. Parental investment and sexual selection. Pages 136-179 in B. G.  
551 Campbell, editor. *Sexual selection and the descent of man, 1871-1971*. Aldine, Chicago
- 552 Van Noordwijk, M. A. (2012). From Maternal Investment to Lifetime Maternal Care. In  
553 *Evolution of Primate Societies* (pp. 321–342).
- 554 Wich, S., Utami-Atmoko, S., Setia, T. M., Rijksen, H. D., Schürmann, C., Van Hooff, J. A. R.  
555 A. ., & van Schaik, C. P. (2004). Life history of wild Sumatran orangutans (*Pongo*

556 abelii). *Journal of Human Evolution*, 47(6), 385–398.

557 Wiig, Ø. (1998). Survival and Reproductive Rates for Polar Bears at Svalbard. *Ursus*, 10, 25–  
558 32.

559 Yoccoz, N. G., Erikstad, K. E., Bustnes, J. O., Hanssen, S. A., & Tveraa, T. (2002). Costs of  
560 reproduction in common eiders ( *Somateria mollissima* ): An assessment of relationships  
561 between reproductive effort and future survival and reproduction based on observational  
562 and experimental studies. *Journal of Applied Statistics*, 29(1–4), 57–64.

563
